# Circulating Tumor Necrosis Factor- $\alpha$ Concentrations in a Native Canadian Population with High Rates of Type 2 Diabetes Mellitus\*

BERNARD ZINMAN, ANTHONY J. G. HANLEY, STEWART B. HARRIS,  
JEREMY KWAN, AND I. GEORGE FANTUS

Samuel Lunenfeld Research Institute, Mount Sinai Hospital (B.Z., A.J.G.H., I.G.F.); and the Banting and Best Diabetes Center (B.Z., J.K., I.G.F.) and the Department of Public Health Sciences (A.J.G.H.), University of Toronto, Toronto, Canada M5G 1X5; and the Thames Valley Family Practice Research Unit, University of Western Ontario (S.B.H.), London, Ontario, Canada N6G 4X8

## ABSTRACT

Recent research suggests that tumor necrosis factor- $\alpha$  (TNF $\alpha$ ) may play an important role in obesity-associated insulin resistance and diabetes. We studied the relationship between TNF $\alpha$  and the anthropometric and physiological variables associated with insulin resistance and diabetes in an isolated Native Canadian population with very high rates of type 2 diabetes mellitus (DM).

A stratified random sample (n = 80) of participants was selected from a population-based survey designed to determine the prevalence of type 2 DM and its associated risk factors. Fasting blood samples for glucose, insulin, triglyceride, leptin, and TNF $\alpha$  were collected; a 75-g oral glucose tolerance test was administered, and a second blood sample was drawn after 120 min. Insulin resistance was estimated using the homeostasis assessment (HOMA) model. Systolic and diastolic blood pressure (BP), height, weight, and waist and hip circumferences were determined, and percent body fat was estimated using biological impedance analysis. The relationship between circulating concentrations of TNF $\alpha$  and the other variables was assessed using Spearman correlation coefficients, analysis of covariance, and multiple linear regression.

The mean TNF $\alpha$  concentration was 5.6 pg/mL (SD = 2.18) and ranged from 2.0–12.9 pg/mL, with no difference between men and women ( $P = 0.67$ ). There were moderate, but statistically significant, correlations between TNF $\alpha$  and fasting insulin, HOMA insulin resistance (HOMA IR) waist circumference, fasting triglyceride, and systolic BP ( $r = 0.23$ – $0.34$ ; all  $P < 0.05$ ); in all cases, coefficients for females were stronger than those for males. Individuals with normal glucose tolerance had lower log TNF $\alpha$  concentrations than those with impaired glucose tolerance or type 2 DM (both  $P = 0.03$ , adjusted for age and sex), although differences were not significant after adjustment for HOMA IR (both  $P > 0.25$ ). Regression analysis indicated that log HOMA IR and log systolic BP were significant independent contributors to variations in log TNF $\alpha$  concentration (model  $r^2 = 0.32$ ). We conclude that in this homogeneous Native Canadian population, circulating TNF $\alpha$  concentrations are positively correlated with insulin resistance across a spectrum of glucose tolerance. The data suggest a possible role for TNF $\alpha$  in the pathophysiology of insulin resistance. (*J Clin Endocrinol Metab* 84: 272–278, 1999)

INSULIN resistance appears to be an important component in the pathophysiology of a number of chronic diseases, including type 2 diabetes mellitus (DM) (1, 2), hypertension (3, 4), cardiovascular disease (3, 4), and hyperlipidemia (3, 4). The etiology of insulin resistance (IR) is unclear, although it appears that both genetic and environmental factors contribute to its development (3–5).

Recent research suggests that tumor necrosis factor- $\alpha$  (TNF $\alpha$ ), an inflammatory cytokine produced mainly by monocytes and macrophages, may play an important role in obesity-associated IR and diabetes (6). *In vitro* studies have shown that TNF $\alpha$  reduces transcriptional activity of the GLUT4 gene (7) and increases IR by inhibition of insulin receptor tyrosine kinase activity in muscle and fat tissue (8, 9). The latter process possibly occurs via stimulation of the

p55 TNF receptor (TNFR) and sphingomyelinase activity (10–12). In humans, adipose tissue TNF $\alpha$  messenger ribonucleic acid (mRNA) levels are correlated positively with percent body fat and body mass index (BMI), and inversely with lipoprotein lipase activity (13, 14). The elevated TNF $\alpha$  mRNA levels in obese subjects are decreased by weight loss, which supports a putative role in the induction of IR (14).

Several attempts have been made to neutralize TNF $\alpha$  *in vivo*. Hotamisligil *et al.* (8, 15) administered a recombinant soluble TNF $\alpha$  receptor-IgG chimeric protein to Zucker fatty rats and reported improvements in insulin sensitivity as well as insulin, glucose, and fatty acid levels. In contrast, Ofei and co-workers (16) used recombinant TNF $\alpha$ -neutralizing antibody and reported no effect on IR in obese subjects with noninsulin-dependent diabetes mellitus. A recently published report demonstrated that targeted disruption of the TNF $\alpha$  gene in mice resulted in reduced body adiposity and triglyceride levels in  $-/-$  nonobese animals, but the absence of TNF $\alpha$  was “not sufficient to substantially protect against insulin resistance” (17). These apparently contradictory findings have led to controversy about the role of TNF $\alpha$  in the IR syndrome.

There have been few studies of TNF $\alpha$  in the clinical setting, and none that we are aware of in the context of population-

Received June 5, 1998. Revision received September 17, 1998. Accepted October 2, 1998.

Address all correspondence and requests for reprints to: Dr. Bernard Zinman, Division of Endocrinology and Metabolism, Mount Sinai Hospital, 600 University Avenue, Suite 782, Toronto, Ontario, Canada M5G 1X5. E-mail: zinman@mshri.on.ca.

\* This work was supported by grants from the NIH (91-DK-01), and the Ontario Ministry of Health (04307), and by Health Canada through a National Health Research and Development Program Research Training Award (to A.J.G.H.).

based epidemiological studies. It may be particularly informative to compare various populations with differing rates of diabetes and obesity. We studied the relationship between TNF $\alpha$  and the anthropometric and physiological variables associated with IR and diabetes in an isolated Native Canadian population with very high rates of type 2 DM.

## Subjects and Methods

### Study population

The community of Sandy Lake, Ontario, Canada, accessible only by air for most of the year, comprises approximately 1600 people and is located roughly 2000 km northwest of Toronto. Historically, the inhabitants of this area lived in small nomadic groups and were physically active; their diet was high in protein from wild meat and fish, with seasonal supplementation with berries and roots. Their lifestyle has changed dramatically over the past several decades, with a marked decrease in physical activity and an alteration in diet to one characterized by excess consumption of saturated fat and processed foods (18). This population is consequently undergoing an epidemiological transition (19), with a marked increase in morbidity related to chronic diseases, such as obesity and type 2 DM (20–22).

The methodology of the Sandy Lake Health and Diabetes Project (SLHDP) has been described in detail in previous publications (23–25). From July 1993 to March 1995, 728 of 1018 (72%) eligible residents of Sandy Lake, aged 10–79 yr, volunteered to participate in a cross-sectional survey to determine the prevalence of type 2 DM and its associated risk factors. Signed informed consent was obtained from all participants, and the study was approved by the Sandy Lake First Nation Band Council and University of Toronto human subjects review committee. The present analysis is based on a stratified random sample ( $n = 80$ ) of the SLHDP study population. Twenty individuals (10 males and 10 females) were randomly selected from each of four glucose tolerance status (GTS) categories: type 2 DM, impaired glucose tolerance (IGT), obese (BMI,  $\geq 24$ ) with normal glucose tolerance (NGT), and nonobese (BMI,  $< 24$ ) NGT.

### Metabolic and biochemical testing

Volunteers provided fasting blood samples for glucose, insulin, lipids, leptin, and TNF $\alpha$  after an 8- to 12-h overnight fast. A 75-g oral glucose tolerance test was administered, and a second blood sample for glucose determination was drawn after 120 min. Individuals were excluded from the oral glucose tolerance test if they had physician-diagnosed diabetes and 1) were currently receiving treatment with insulin or oral hypoglycemic agents or 2) had a fasting blood glucose exceeding 11.1 mmol/L. Diabetes and IGT were diagnosed according to established criteria (26).

Fasting plasma insulin concentrations were determined by RIA. IR was estimated using the homeostasis model assessment (HOMA) approach of Matthews and colleagues (27). Plasma concentrations of total triglyceride were measured using procedures described in the *Lipid Research Clinics Manual of Operations* (28). Glucose level was determined using standard laboratory procedures.

The TNF $\alpha$  concentration was measured using the quantitative sandwich enzyme immunoassay technique (R & D Systems, Minneapolis, MN), which has an interassay coefficient of variation of 7.5–10.4% and a lower limit of detection of 0.5 pg/mL. Measurements were made using specimens that had been stored at  $-70$  C for approximately 3 yr. Although we have no direct information on the stability of TNF $\alpha$  over time at this temperature, it has been suggested that other cytokines show no loss of activity after storage at various temperatures (up to 56 C) for 1 yr (29). In addition, Thavasu and colleagues demonstrated that there was “no effect on TNF $\alpha$  levels after six repeat freeze/thaw cycles” (samples frozen at  $-40$  C) (30).

### Assessment of anthropometry, blood pressure (BP), and medication use

Anthropometric measurements were performed without shoes and with the volunteer wearing either undergarments and a hospital gown

or light athletic clothing. Each measurement was performed twice, and the average was used in the analysis. Height was measured to the nearest 0.1 cm using a wall-mounted stadiometer. Weight was measured to the nearest 0.1 kg using a hospital balance beam scale. BMI was defined as weight (kilograms)/height (meters)<sup>2</sup>. The waist was measured to the nearest 0.5 cm at the minimal circumference between the umbilicus and xiphoid process; the hips were measured to the nearest 0.5 cm at maximum extension of the buttocks. The waist/hip ratio (WHR) was calculated as the ratio of these two circumferences.

The percent body fat was estimated by bioelectrical impedance analysis using the Tanita TBF-201 Body Fat Analyzer (Tanita Corp., Tokyo, Japan). We have documented high reproducibility of percent fat estimates using this machine (intraclass correlation coefficient = 0.99) (31) in a sample from this population. The instrument has been validated against dual energy x-ray absorptiometry in a number of populations (32–34).

BP was measured in the right arm with the volunteer seated and the arm bared. Systolic BP was recorded to the nearest 2 mm Hg at the appearance of the first Korotkoff sound (phase I), and diastolic BP was recorded to the nearest 2 mm Hg at the appearance of the fifth Korotkoff sound (phase V). Two measurements were performed using a hand-held aneroid sphygmomanometer, and the average of the two was used in the analysis.

Current use of medications for diabetes and hypertension was determined from patient medical files and pharmaceutical log books.

### Statistical analysis

All statistical analyses were conducted using SAS version 6.09 in the VMS environment (35). Data are presented as means, sds, medians, and ranges. Relationships between continuous variables were assessed using Spearman correlation coefficients. Distributions of continuous variables were tested for normality, and, if appropriate, the natural log transformations of skewed variables were used in subsequent analyses. *t* tests were employed to assess differences between groups, and analysis of covariance was used to test for differences between groups while adjusting for other factors.

Multiple linear regression models were constructed to examine factors that were associated with variations in TNF $\alpha$  concentration. The log transformation of serum TNF $\alpha$  was used as the dependent variable. Independent variables were included in the initial models according to the strength of their univariate relationships with serum TNF $\alpha$  and their biological importance based on the scientific evidence available at the time the analysis was conducted. Terms for interaction effects between gender and other independent variables were initially added to the full regression model as a global test for interactions. None of these interactions was statistically significant (all  $P > 0.05$ ; data not shown), and thus subsequent modelling was performed with the genders pooled. In addition to the full regression model approach, a backward stepwise elimination procedure was employed to assist in the construction of models that best predicted TNF $\alpha$  concentration in this sample (36).

## Results

The mean TNF $\alpha$  concentration was 5.6 pg/mL (sd = 2.18) and ranged from 2.0–12.9 pg/mL. There were no differences between males and females in terms of age, TNF $\alpha$ , fasting insulin, glucose (fasting and 2 h post-challenge), fasting triglycerides, and waist circumference (Table 1). The percent body fat and leptin levels were significantly higher among females ( $P < 0.001$ ), whereas males had significantly elevated WHRs and BP levels (both systolic and diastolic) relative to females ( $P < 0.05$ ; Table 1).

There were moderate, statistically significant correlations between log-normal (ln) TNF $\alpha$  and fasting insulin, HOMA IR, waist circumference, fasting triglyceride, and systolic BP; in all cases, coefficients for females were higher than those for males (Table 2 and Figs. 1 and 2). The associations between TNF $\alpha$  and BMI, WHR, fasting glucose, and 2-h PC glucose were of borderline significance, with higher sex-specific co-

**TABLE 1.** Metabolic and anthropometric characteristics of a sample of participants from the Sandy Lake Health and Diabetes Project, by gender (n = 80)

| Variable                 | Males (n = 40) |       |              | Females (n = 40) |       |              | P value |
|--------------------------|----------------|-------|--------------|------------------|-------|--------------|---------|
|                          | Mean           | SD    | Range        | Mean             | SD    | Range        |         |
| Age (yr)                 | 36.81          | 15.04 | 13.49–75.32  | 34.90            | 14.52 | 11.20–63.20  | 0.564   |
| TNF $\alpha$             | 5.58           | 2.03  | 3.28–12.79   | 5.55             | 2.34  | 1.96–12.91   | 0.666   |
| BMI (kg/m <sup>2</sup> ) | 26.77          | 5.36  | 16.56–36.47  | 27.44            | 5.84  | 17.17–38.04  | 0.657   |
| % Body fat (%)           | 26.82          | 8.88  | 4.10–40.90   | 42.69            | 10.82 | 18.30–57.80  | <0.001  |
| Waist (cm)               | 96.99          | 13.55 | 72.50–124.75 | 92.80            | 12.16 | 69.00–115.00 | 0.149   |
| Waist hip ratio          | 0.95           | 0.07  | 0.82–1.09    | 0.88             | 0.06  | 0.75–1.01    | <0.001  |
| Fasting glucose (mmol/L) | 6.76           | 2.93  | 4.60–17.90   | 7.01             | 3.87  | 3.70–21.30   | 0.743   |
| 2-h glucose (mmol/L)     | 8.27           | 6.11  | 1.70–29.60   | 8.35             | 5.59  | 2.7–32.1     | 0.952   |
| Fasting insulin (pmol/L) | 108.70         | 63.67 | 30.00–372.00 | 143.18           | 87.78 | 25.00–354.00 | 0.106   |
| HOMA IR                  | 4.78           | 3.76  | 1.00–18.60   | 6.26             | 4.58  | 0.77–19.19   | 0.198   |
| Triglyceride (mmol/L)    | 1.78           | 1.02  | 0.63–5.04    | 1.66             | 0.95  | 0.63–4.77    | 0.661   |
| Fasting leptin (ng/L)    | 7.70           | 5.76  | 1.10–27.40   | 19.71            | 11.05 | 3.30–45.30   | <0.001  |
| Systolic BP              | 124.89         | 13.78 | 101.0–180.0  | 115.91           | 16.59 | 83.5–170.0   | 0.005   |
| Diastolic BP             | 70.61          | 13.09 | 42.0–96.0    | 65.14            | 9.77  | 49.0–90.0    | 0.037   |
|                          | n              | %     |              | n                | %     |              |         |
| Diabetes (%)             | 10             | 25    |              | 10               | 25    |              |         |
| IGT (%)                  | 10             | 25    |              | 10               | 25    |              |         |

Values are means (SD) unless otherwise indicated.

**TABLE 2.** Spearman correlation coefficients between TNF $\alpha$  and selected metabolic and anthropometric variables among a sample of participants in the Sandy Lake Health and Diabetes Project (n = 80)

|            | Age    | BMI             | % Fat  | Waist       | WHR    | Insulin     | IR     | Triglycerides | Leptin |
|------------|--------|-----------------|--------|-------------|--------|-------------|--------|---------------|--------|
| Both sexes | 0.14   | 0.19            | 0.12   | 0.24        | 0.22   | 0.32        | 0.34   | 0.23          | 0.17   |
| P          | 0.2140 | 0.0887          | 0.2714 | 0.0328      | 0.0486 | 0.0043      | 0.0019 | 0.0366        | 0.1280 |
| Males      | 0.13   | 0.10            | 0.10   | 0.19        | 0.36   | 0.16        | 0.26   | 0.13          | 0.09   |
| P          | 0.4413 | 0.5214          | 0.5486 | 0.2408      | 0.0240 | 0.3378      | 0.1087 | 0.4299        | 0.5613 |
| Females    | 0.15   | 0.24            | 0.13   | 0.29        | 0.15   | 0.47        | 0.38   | 0.38          | 0.33   |
| P          | 0.3416 | 0.1322          | 0.4223 | 0.0671      | 0.3656 | 0.0021      | 0.0151 | 0.0142        | 0.0394 |
|            |        | Fasting glucose |        | 2-h glucose |        | Systolic BP |        | Diastolic BP  |        |
| Both sexes |        | 0.21            |        | 0.21        |        | 0.25        |        | 0.18          |        |
| P          |        | 0.0600          |        | 0.0744      |        | 0.0225      |        | 0.1095        |        |
| Males      |        | 0.25            |        | 0.30        |        | 0.03        |        | 0.10          |        |
| P          |        | 0.1257          |        | 0.0671      |        | 0.8713      |        | 0.5501        |        |
| Females    |        | 0.18            |        | 0.12        |        | 0.46        |        | 0.28          |        |
| P          |        | 0.2600          |        | 0.4865      |        | 0.0030      |        | 0.0750        |        |

BP, Blood pressure.

efficients among males for the latter three variables (Table 2). The relationships between TNF $\alpha$  and age, percent body fat, diastolic BP, and leptin were generally weak, although the positive correlation with leptin among females was notable (Table 2). When individuals with diabetes were excluded from the correlation analysis, coefficients were stronger for all variables among women and weaker for all variables among men (data not shown). With the sexes pooled, correlations were slightly stronger for all factors except fasting and 2-h PC glucose (data not shown).

Individuals with NGT had lower TNF $\alpha$  concentrations than those with IGT or type 2 DM. These differences were statistically significant, both unadjusted as well as adjusted for age and sex. When these comparisons were further controlled for log HOMA IR, however, differences were no longer significant (both  $P > 0.25$ ; Fig. 3).

We used multiple linear regression to examine factors that were associated with variation in ln TNF $\alpha$  concentration. Independent variables that were considered included age, WHR, percent body fat, and diastolic BP; the log transformations of triglyceride concentration, HOMA IR, leptin concentration, and

systolic BP; and indicator variables for gender, IGT, diabetes, and use of hypertension medication. Waist circumference and BMI were not included in the same multivariate model due to very strong colinearity between these two variables.

Backward stepwise elimination was used to assist in the construction of a regression model that best predicted the TNF $\alpha$  concentration in this sample. Using an inclusion criterion of  $P = 0.05$ , log HOMA IR and log systolic BP were determined to be significant independent factors by this procedure (model  $F = 11.45$ ;  $P < 0.0001$ ; model  $r^2 = 0.23$ ; log HOMA IR:  $b = 0.16$ ,  $t = 3.23$ ,  $P = 0.0018$ ; log systolic BP:  $b = 1.03$ ,  $t = 3.44$ ,  $P = 0.0009$ ). The full linear regression model is presented in Table 3. Log HOMA IR and log systolic BP were independently related to log TNF $\alpha$ ; none of the other factors in the model was significantly associated in the presence of other variables (model  $r^2 = 0.28$ ).

## Discussion

The role of TNF $\alpha$  in the pathogenesis of IR in humans is controversial. In this study of an isolated Native Canadian

FIG. 1 Correlations between TNF $\alpha$  and HOMA IR in men (●) and women (○).

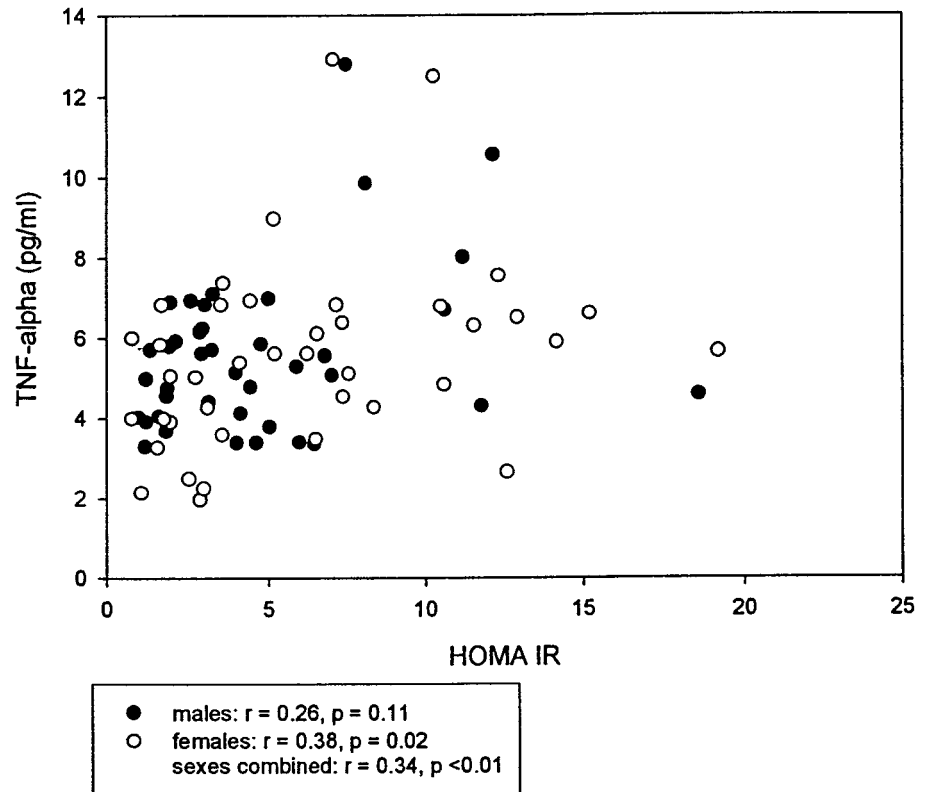

FIG. 2. Correlations between ln TNF $\alpha$  and systolic BP in men (●) and women (○).

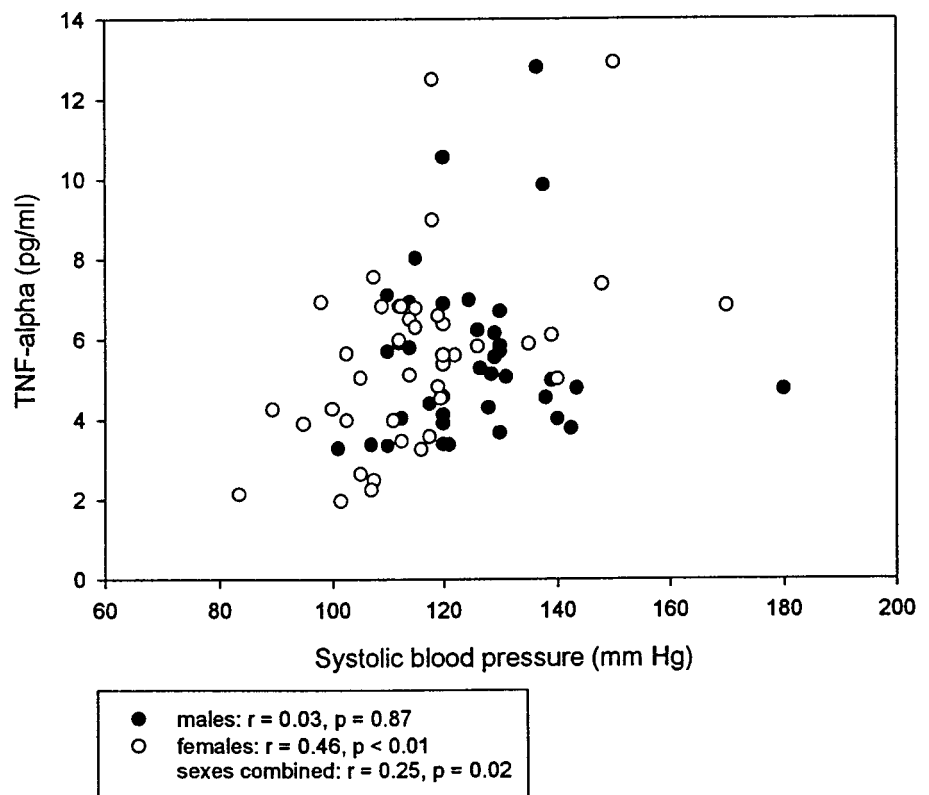

community, we found that in subjects with varying degrees of obesity and glucose intolerance there was a significant correlation of circulating TNF $\alpha$  concentrations with fasting

insulin as well as with HOMA IR, a measure of IR. TNF $\alpha$  was also significantly correlated with waist circumference, WHR, fasting triglycerides, and systolic blood pressure, parameters



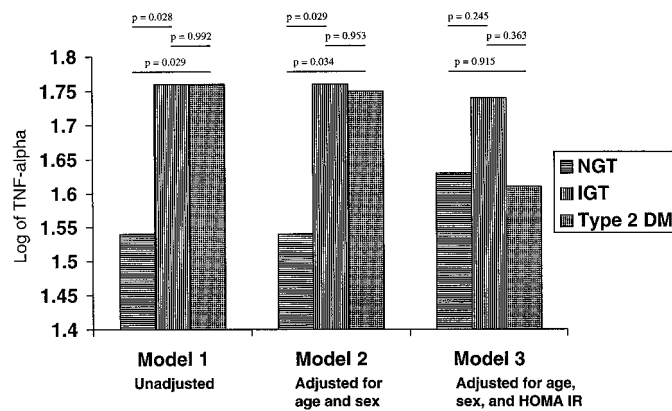

FIG. 3. TNF $\alpha$  concentrations in NGT, IGT, and type 2 DM groups.

previously demonstrated to be positively associated with IR. Multiple linear regression analysis along with backward stepwise elimination revealed that only HOMA IR and systolic blood pressure remained significant and independent predictors of TNF $\alpha$ .

Studies in rodents support a role for TNF $\alpha$  as a mediator of IR (8, 15, 37). In human subjects, elevated adipose tissue TNF $\alpha$  mRNA content and fasting insulin are correlated, and both decrease with weight loss (13, 14). Although circulating TNF $\alpha$  concentrations are elevated in obese rodents (15), this has been difficult to substantiate in human subjects (6, 13, 37). This is due in part to the low circulating levels and previous lack of ultrasensitive assays. Furthermore, elevated local production of TNF $\alpha$  in adipose tissue may not always be reflected in peripheral blood, as the cytokine is synthesized and secreted by other tissues, notably monocytes/macrophages (38), and may not always be released into the circulation by the adipose tissue (39). A local autocrine/paracrine action may also explain in part the inability to reverse the IR with anti-TNF $\alpha$  antibody administration in human subjects (16).

It has been suggested that TNF $\alpha$  interaction with its cell surface receptor results in proteolytic cleavage of the extracellular binding domain, releasing a substantial amount of soluble receptor (40–44). One study found that circulating levels of soluble TNFR2, the soluble portion of the larger 80-kDa TNFR, but not TNFR1 (55 or 60 kDa), were elevated in obese subjects and correlated with IR (45), whereas another study reported that circulating levels of the smaller p55 TNFR correlated with insulin levels, BMI, and serum leptin concentrations (46). Although it has been proposed that the longer circulating  $t_{1/2}$  of the soluble receptors may provide a more accurate reflection of TNF $\alpha$  action (42–44), further studies are required to determine whether this is the case for obesity and IR, and which form of receptor best reflects the cytokine action in adipose tissue.

In another study elevated circulating TNF $\alpha$  levels were found in Caucasian men (but not in women) with type 2 DM compared with levels in nondiabetic men (47). In our study, TNF $\alpha$  levels were also higher in type 2 DM as well as in IGT compared to NGT subjects in both genders. Notably, adjustment for HOMA IR eliminated these differences, supporting the concept that the association of elevated TNF $\alpha$  concentrations with abnormalities in glucose metabolism is related to the IR. The stronger correlation of TNF $\alpha$  with HOMA-IR

TABLE 3. Results of multiple linear regression analysis: independent association of anthropometric and metabolic factors with log TNF $\alpha$

| Variable                       | Parameter estimate | SE    | <i>t</i> | <i>P</i> |
|--------------------------------|--------------------|-------|----------|----------|
| Age                            | -0.0005            | 0.003 | -0.143   | 0.886    |
| Gender                         | 0.2456             | 0.171 | 1.436    | 0.156    |
| Log HOMA insulin resistance    | 0.2211             | 0.093 | 2.377    | 0.020    |
| Log triglyceride concentration | 0.0383             | 0.100 | 0.383    | 0.703    |
| % Body fat                     | -0.0119            | 0.008 | -1.579   | 0.119    |
| Waist/hip ratio                | 1.1334             | 0.890 | 1.273    | 0.207    |
| Diabetes                       | -0.1253            | 0.124 | -1.009   | 0.317    |
| Log systolic BP                | 1.1366             | 0.393 | 2.893    | 0.005    |
| Diastolic BP                   | -0.0008            | 0.004 | -0.191   | 0.849    |
| Log leptin                     | 0.0306             | 0.092 | 0.334    | 0.740    |

Model  $r^2 = 0.28$ .

in women in our study may be due to their greater degree and range of obesity, as adipose tissue is probably the major source of excess TNF $\alpha$  in these subjects.

IR precedes the development of glucose intolerance in the offspring of type 2 DM subjects (1–4). Kellerer *et al.* reported a significant negative correlation between circulating TNF $\alpha$  levels and glucose disposal rate determined by the euglycemic hyperinsulinemic clamp technique in both German and Finnish nondiabetic offspring of type 2 DM parents (48). In that study multiple linear regression analysis revealed a significant correlation of TNF $\alpha$  with the percentage of desirable body weight. These data are consistent with the increased synthesis and secretion of TNF $\alpha$  in adipose tissue of obese subjects, but did not show that TNF $\alpha$  was directly related to the IR. It should be noted that lean subjects with type 2 DM are also insulin resistant (3–5). Thus, the etiology of IR as well as that of type 2 DM appear to be multifactorial and heterogeneous among different populations (2–5). Our study is unique, in that a genetically homogeneous isolated Native Canadian population was examined.

Another approach to substantiate a role for TNF $\alpha$  in human obesity is genetic analysis. Studies of the TNF $\alpha$  gene-coding sequence and promoter region in both Caucasians and Pima Indians did not find any polymorphisms associated with type 2 DM or obesity (49, 50). However, a marker located 10 kb from the TNF $\alpha$  gene was associated with BMI in the Pima study (50). In another study, the *NcoI* restriction site of the TNF $\alpha$  promoter was associated with increased percent body fat, leptin levels, and IR (51). However, circulating TNF $\alpha$  levels were not different. These data do not prove but suggest that the up-regulation of TNF $\alpha$  is, in general, an acquired accompaniment of the obese state.

The explanation of the independent predictive value of systolic BP on TNF $\alpha$  concentration is not known. However, recent studies in the spontaneously hypertensive rat (SHR) model found that TNF $\alpha$  synthesis and secretion are increased in response to lipopolysaccharide stimulation compared with those in nonhypertensive control rats (52, 53); interestingly, this is most marked in adipose tissue (54). Furthermore, TNF $\alpha$  has been reported to stimulate angiotensinogen gene expression in liver (55). These data raise the possibility of TNF $\alpha$  contributing to the elevated BP. On the other hand, Ferreri *et al.* found that TNF $\alpha$  production by the thick as-

ending tubule of the renal medulla was elevated in angiotensin II-dependent hypertensive rats and that neutralization with anti-TNF $\alpha$  antiserum exacerbated the hypertension (56). Thus, the mechanism of the relationship between BP and TNF $\alpha$  and its pathophysiological significance in hypertensive human subjects remains to be determined.

In summary, this study demonstrates that in a genetically homogeneous Native Canadian population there is a significant and independent association between the circulating TNF $\alpha$  concentration and IR. Systolic BP, well documented to be associated with IR and obesity (4), also showed a significant independent association. Furthermore, elevated levels of TNF $\alpha$  in subjects with abnormal glucose tolerance and overt diabetes could be accounted for by their degrees of IR. Thus, our data support a significant contribution of TNF $\alpha$  to the pathogenesis of obesity-related IR and glucose intolerance in this population.

### Acknowledgments

The authors acknowledge the following groups and individuals, whose cooperation was essential in the design and implementation of this project: the chief, council, and community members of Sandy Lake First Nation; the Sandy Lake community surveyors (Louisa Kakegamic, Tina Noon, Madeliene Kakegamic, and Elda Anishinabie); the Sandy Lake nurses; the staff of the University of Toronto Sioux Lookout Program; the Department of Clinical Epidemiology of the Samuel Lunenfeld Research Institute; Dr. Alexander Logan; and Annette Barnie. We also thank Drs. Joe Gao and Shelley Bull for advice on the statistical analysis.

### References

- Zimmet P, Dowse G, Bennett P. Hyperinsulinaemia is a predictor of non-insulin dependent diabetes mellitus. *Diabetes Metab.* 17:101-108.
- Rewers M, Hamman RF. 1995 Risk factors for non-insulin dependent diabetes mellitus. In: Harris MI, Cowie CC, Stern MP, Boyko EJ, Reiber GE, Bennett PH, eds. *Diabetes in America*, 2nd ed. National Diabetes Data Group. Bethesda: U.S. Government Printing Office; NIH Publication 95-1468; pp 179-220.
- Reaven GM. 1988 Role of insulin resistance in human disease. *Diabetes.* 37:1595-1607.
- DeFronzo RA, Ferrannini E. 1991 Insulin resistance. A multifaceted syndrome responsible for NIDDM, obesity, hypertension, dyslipidemia, and atherosclerotic cardiovascular disease. *Diabetes Care.* 34:416-422.
- Moller DE, Bjorbaek C, Vidal-Puig A. 1996 Candidate genes for insulin resistance. *Diabetes Care.* 19:396-400.
- Hotamisligil GS, Spiegelman BM. 1996 TNF- $\alpha$ , and the insulin resistance of obesity. In: LeRoith D, Taylor SI, Olefsky JM, eds. *Diabetes mellitus*. Philadelphia: Lippincott-Raven; 554-560.
- Stephens JM, Lee J, Pilch PF. 1997 Tumor necrosis factor- $\alpha$ -induced insulin resistance in 3T3-L1 adipocytes is accompanied by a loss of insulin receptor substrate-1 and GLUT4 expression without a loss of insulin-receptor-mediated transduction. *J Biol Chem.* 272:971-976.
- Hotamisligil GS, Budavari A, Murray D, Spiegelman BM. 1994 Reduced tyrosine kinase activity of the insulin receptor in obesity-diabetes. Central role of tumor necrosis factor  $\alpha$ . *J Clin Invest.* 94:1543-1549.
- Hotamisligil GS, Murray D, Choy LN, Spiegelman BM. 1994 Tumor necrosis factor  $\alpha$  inhibits signaling from the insulin receptor. *Proc Natl Acad Sci USA.* 91:4854-4858.
- Peraldi P, Hotamisligil GS, Buurman WA, White MF, Spiegelman BM. 1996 Tumor necrosis factor (TNF)- $\alpha$  inhibits insulin signaling through stimulation of the p55 TNF receptor and activation of sphingomyelinase. *J Biol Chem.* 271:13018-13022.
- Kanety H, Feinstein R, Papa MZ, Hemi R, Karasik A. 1995 Tumor necrosis factor  $\alpha$ -induced phosphorylation of insulin receptor substrate-1 (IRS-1). Possible mechanism for suppression of insulin-stimulated tyrosine phosphorylation of IRS-1. *J Biol Chem.* 270:23780-23784.
- Kanety H, Hemi R, Papa MZ, Karasik A. 1996 Sphingomyelinase and ceramide suppress insulin-induced tyrosine phosphorylation of the insulin receptor substrate-1. *J Biol Chem.* 271:9895-9897.
- Hotamisligil GS, Arner P, Caro JF, Atkinson RL, Spiegelman BM. 1995 Increased adipose tissue expression of tumor necrosis factor  $\alpha$  in human obesity and insulin resistance. *J Clin Invest.* 95:2409-2415.
- Kern PA, Saghizadeh M, Ong JM, Bosch RJ, Deem R, Simsolo RB. 1995 The expression of tumor necrosis factor in human adipose tissue. Regulation by obesity, weight loss, and relationship to lipoprotein lipase. *J Clin Invest.* 95:2111-2199.
- Hotamisligil GS, Shargill NS, Spiegelman BM. 1993 Adipose expression of tumor necrosis factor- $\alpha$ : direct role in obesity linked insulin resistance. *Science.* 259:87-91.
- Ofei F, Hurel S, Newkirk J, Sopwith M, Taylor R. 1996 Effects of an engineered human anti-TNF- $\alpha$  antibody (CDP571) on insulin sensitivity and glycemic control in patients with NIDDM. *Diabetes.* 45:881-885.
- Ventre J, Doebber T, Wu M, et al. 1997 Targeted disruption of the tumor necrosis factor- $\alpha$  gene. Metabolic consequences in obese and non-obese mice. *Diabetes.* 46:1526-1531.
- Young TK. 1988 Health care and cultural change: the Indian experience in the central subarctic. Toronto: University of Toronto Press; pp 16-31.
- Young TK. 1988 Are subarctic Indians undergoing the epidemiologic transition? *Soc Sci Med.* 26:659-671.
- McIntyre L, Shah CP. 1986 Prevalence of hypertension, obesity and smoking in three Indian communities in northwestern Ontario. *Can Med Assoc J.* 134:349-349.
- Delisle HF, Ekoe J. 1993 Prevalence of non-insulin-dependent diabetes mellitus and impaired glucose tolerance in two Algonquin communities in Quebec. *Can Med Assoc J.* 148:41-47.
- Fox C, Harris SB, Whalen-Brough E. 1994 Diabetes among Native Canadians in northwestern Ontario: 10 years later. *Chronic Dis Can.* 15:92-96.
- Hanley AJG, Harris SB, Barnie A, et al. 1995 The Sandy Lake Health, and Diabetes Project: design, methods and lessons learned. *Chronic Dis Can.* 16:149-156.
- Gittelsohn J, Harris SB, Burris K, et al. 1996 Use of ethnographic methods for applied research on diabetes among Ojibway-Cree Indians in Northern Ontario. *Health Educ Q.* 23:365-382.
- Harris SB, Gittelsohn J, Hanley AJG, et al. 1997 The prevalence of NIDDM and associated risk factors in aboriginal Canadians. *Diabetes Care.* 20:185-187.
- WHO. 1985 Diabetes mellitus: report of a WHO study group. Geneva: WHO; WHO Technical Rep Ser 727.
- Matthews DR, Hosker JP, Rudenski AS, Naylor BA, Treacher DF, Turner RC. 1985 Homeostasis model assessment: insulin resistance and  $\beta$ -cell function from fasting plasma glucose and insulin concentrations. *Diabetologia.* 28:412-419.
- Lipid Research Clinics Program. 1984 Manual of laboratory operations. Bethesda: U.S. Government Printing Office; 1-81; DHEW Publication (NIH) 756282.
- Dawson PJ. 1991 Effect of formulation and freeze-drying on the long-term stability of rDNA-derived cytokines. *Dev Biol Standard.* 74:273-284.
- Thavasu PW, Longhurst S, Joel SP, Slevin ML, Balkwill FR. 1992 Measuring cytokine levels in blood. Importance of anticoagulants, processing, and storage conditions. *J Immunol Methods* 153:115-124.
- Hanley AJG, Harris SB, Barnie A, Smith J, Logan A, Zinman B. 1994 Usefulness of bioelectrical impedance analysis in a population-based study of diabetes among Native Canadians. *Int J Obesity.* 18(Suppl 2):O383.
- Sakamoto Y, Miura J, Yamaguchi Y, Ohno M, Ike Y. 1994 Usefulness of bioelectrical impedance analysis for measurement of body fat. *Int J Obesity.* 18(Suppl 2):P501.
- Nunez C, Gallagher D, Visser M, Pi-Sunyer FX, Wang Z, Heymsfield SB. 1997 Bioimpedance analysis: evaluation of a leg-to-leg system based on pressure contact foot-pad electrodes. *Med Sci Sports Exerc.* 29:524-531.
- Tsui EYL, Gao XJ, Zinman B. 1998 Bioelectrical impedance analysis (BIA) using bipolar foot electrodes in the assessment of body composition in type 2 diabetes mellitus. *Diabetic Med.* 15:125-128.
- SAS Institute. 1990 SAS/STAT user's guide, version 6, 4th ed. Cary: SAS Institute.
- Weisberg S. 1980 Applied linear regression. New York: Wiley and Sons.
- Hotamisligil GS, Spiegelman BM. 1994 TNF- $\alpha$ : a key component of obesity-diabetes link. *Diabetes.* 43:1271-1278.
- Bemelmans MHA, Van Tis LJJ, Buurman WA. 1996 Tumor necrosis factor: function, release and clearance. *Crit Rev Immunol.* 16:1-11.
- Mohamed-Ali V, Goodrick S, Rawesh A, et al. 1997 Subcutaneous adipose tissue releases interleukin-6, but not tumor necrosis factor- $\alpha$ , *in vivo*. *J Clin Endocrinol Metab.* 82:4196-4200.
- Warzocha K, Bienvenu J, Coiffier B, Salles G. 1995 Mechanisms of action of the tumor necrosis factor and lymphotoxin ligand-receptor system. *Eur Cytokine Netw.* 6:83-96.
- Diez-Ruiz A, Tilz GP, Zangerle R, Baier-Bitterlich G, Wachter H, Fuchs D. 1995 Soluble receptors for tumor necrosis factor in clinical laboratory diagnosis. *Eur J Haematol.* 54:1-8.
- Samsonov MY, Tilz GP, Egorova O, et al. 1995 Serum soluble markers of immune activation and disease activity in systemic lupus erythematosus. *Lupus* 4:29-32.
- Schroder J, Stuber F, Galatti H, Schade FU, Kremer B. 1995 Pattern of soluble TNF receptors I and II in sepsis. *Infection.* 23:143-148.
- Gattoro M, Picco P, Buoncompagni A, et al. 1996 Serum p55 and p75 tumour necrosis factor receptors as markers of disease activity in juvenile chronic arthritis. *Ann Rheum Dis.* 55:243-247.
- Hotamisligil GS, Arner P, Atkinson RL, Spiegelman BM. 1997 Differential

- regulation of the p80 tumor necrosis factor receptor in human obesity and insulin resistance. *Diabetes*. 46:451–455.
46. **Mantzoros C, Moschos S, Avramopoulos I, et al.** 1997 Leptin concentrations in relation to body mass index and the tumor necrosis factor- $\alpha$  system in humans. *J Clin Endocrinol Metab*. 82:3408–3413.
  47. **Pfeiffer A, Janott J, Mohlig M, et al.** 1997 Circulating tumor necrosis factor- $\alpha$  is elevated in male but not in female patients with type II diabetes mellitus. *Horm Metab Res*. 29:111–114.
  48. **Kellerer M, Rett K, Renn W, Groop L, Haring HU.** 1996 Circulating TNF- $\alpha$ , and leptin levels in offspring of NIDDM patients do not correlate to individual insulin sensitivity. *Horm Metab Res*. 28:737–743.
  49. **Hamann A, Mantzoros C, Vidal-Puig A, Flier JS.** 1995 Genetic variability in the TNF- $\alpha$  promoter is not associated with type II diabetes mellitus (NIDDM). *Biochem Biophys Res Commun*. 211:833–839.
  50. **Norman RA, Bogardus C, Ravussin E.** 1995 Linkage between obesity and a marker near the tumor necrosis factor- $\alpha$  locus in Pima Indians. *J Clin Invest*. 96:158–162.
  51. **Fernandez-Real JM, Gutierrez C, Ricart W, et al.** 1997 The TNF- $\alpha$  gene Nco I polymorphism influences the relationship among insulin resistance, percent body fat, and increased serum leptin levels. *Diabetes*. 46:1468–1472.
  52. **Liu Y, Liu T, McCarron RM, et al.** 1996 Evidence for activation of endothelium and monocytes in hypertensive rats. *Am J Physiol*. 270:H2125–H21231.
  53. **Chou TC, Yen MH, Li CY, Ding YA.** 1998 Alterations of nitric oxide synthase expression with aging and hypertension in rats. *Hypertension*. 31:643–648.
  54. **Nyui N, Tamura K, Yamaguchi S, et al.** 1997 Tissue angiotensinogen gene expression induced by lipopolysaccharide in hypertensive rats. *Hypertension*. 30:859–867.
  55. **Brasier AR, Li J, Wimbish KA.** 1996 Tumor necrosis factor activates angiotensinogen gene expression by the Rel A transactivator. *Hypertension*. 27:1009–1017.
  56. **Ferreri NR, Zhao Y, Takizawa H, McGiff JC.** 1997 Tumor necrosis factor- $\alpha$ -angiotensin interactions and regulation of blood pressure. *J Hypertension*. 15:1481–1484.
